# Supplementary material
Source: PubMed Central journal article supplement (PMC4079463)
Supplement: NIHMS601834-supplement-Supplemental_Files.pdf [file NIHMS601834-supplement-Supplemental_Files.pdf]

**A**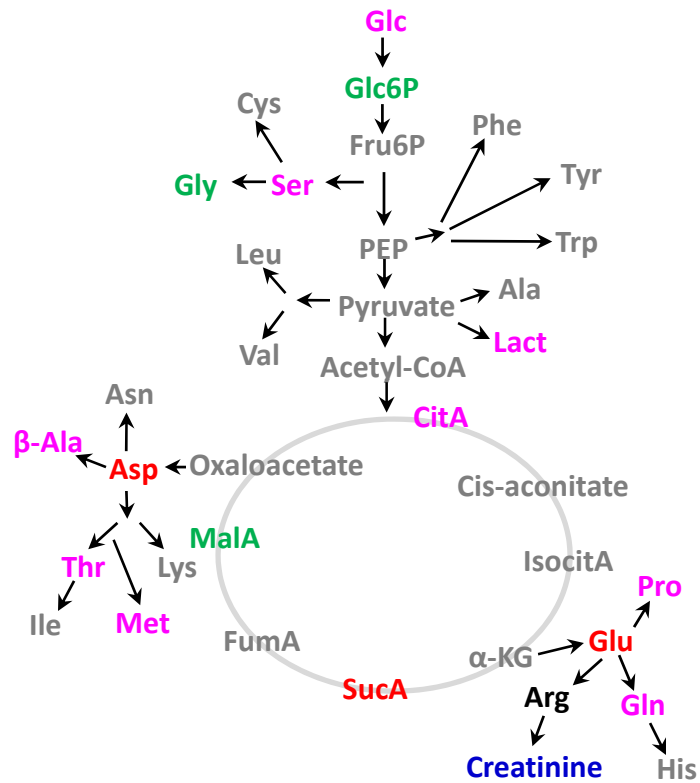**B**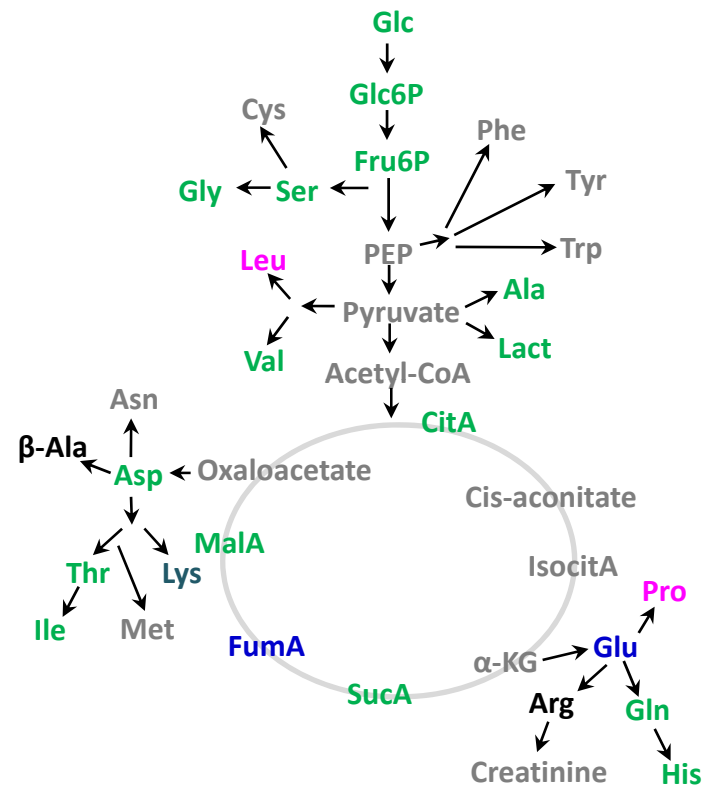

**FIG. S1:** Differences of metabolites in glycolysis/TCA cycle and amino acids between control and high-MMR lines of mice; **(A)** gastrocnemius muscle; **(B)** liver. The metabolites in red indicate significantly higher levels in high-MMR, while the metabolites in blue indicate significantly lower levels in high-MMR. The metabolites in fuschia indicate non-significant higher levels in high-MMR, while the metabolites in green indicate non-significant lower levels in high-MMR. The metabolites in black indicate that there is no difference between control and high-MMR, while the metabolites in gray indicate that they are below detection level (not detected).
